# Supplementary figures and images for: Purple urine bag syndrome in benign prostatic hyperplasia patient
Source: Springer Nature journal article supplement (doi:10.1186/s41100-017-0134-7), 2017-10-13

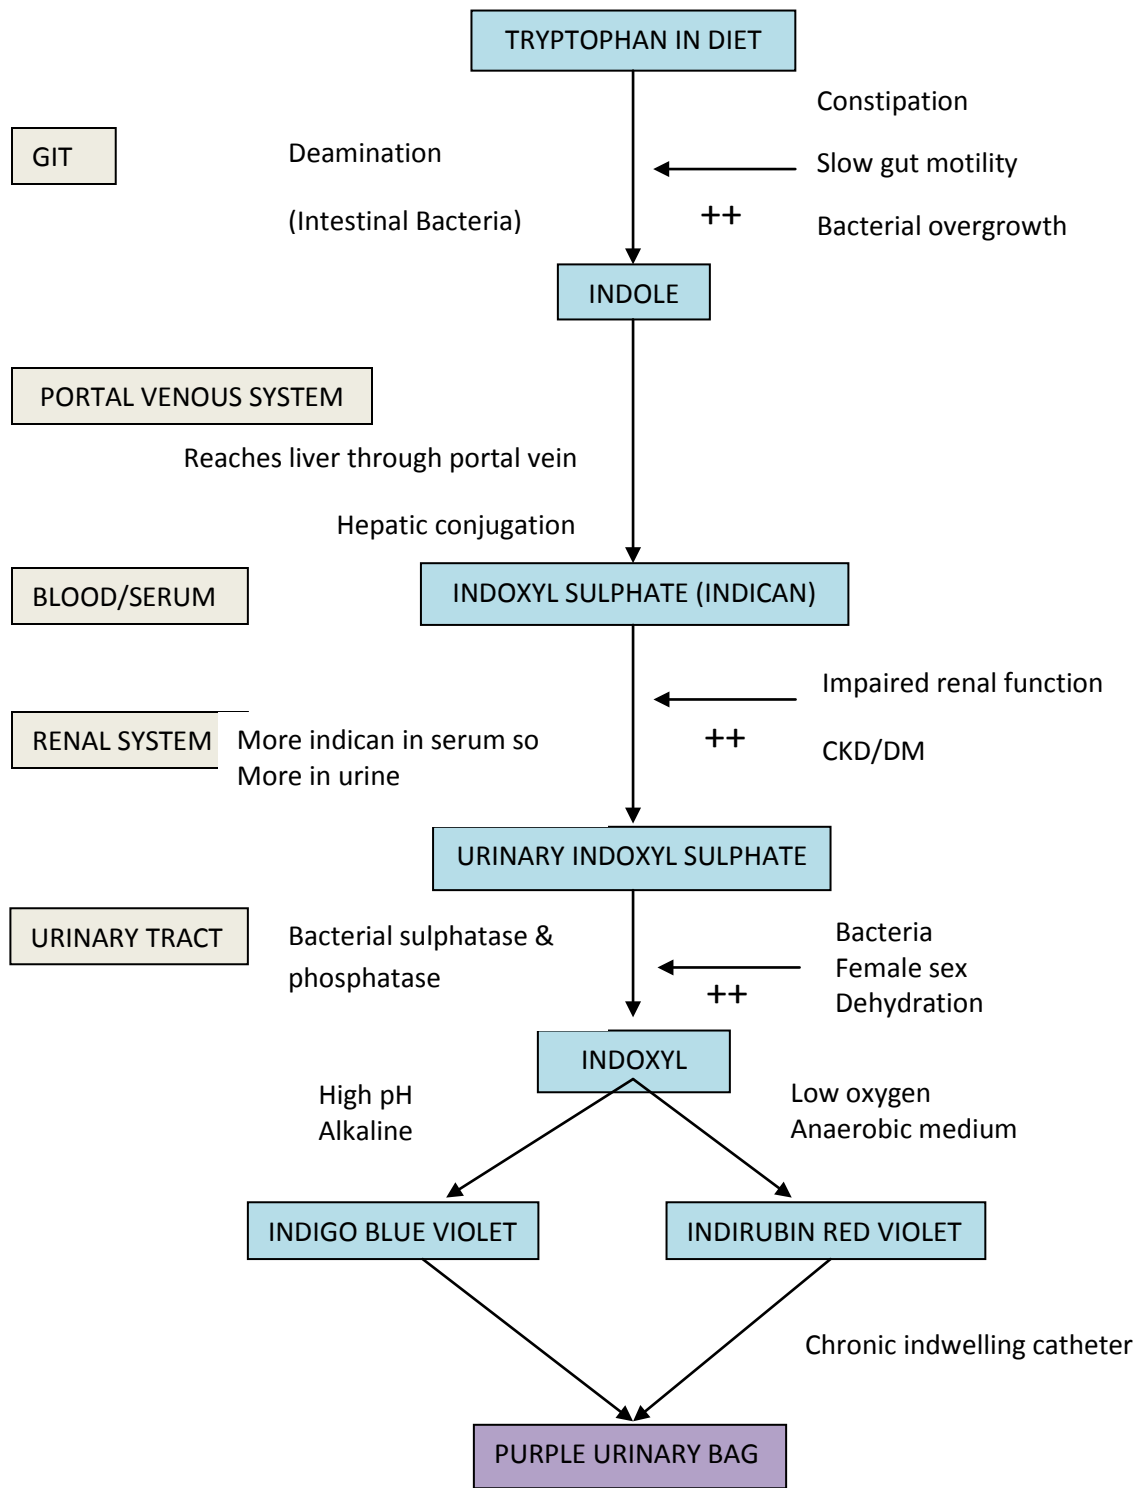

**METABOLIC PATHWAY & PROPOSED PATHOPHYSIOLOGICAL MECHANISM**

Supplement: MOESM1 [file 41100_2017_134_MOESM1_ESM.pdf]
